# Supplementary material for: Metachronal patterns by magnetically-programmable artificial cilia surfaces for low Reynolds number fluid transport and mixing
Source: Royal Society of Chemistry journal article supplement (doi:10.1039/d1sm01680f), 2022-01-01
Supplement: d1sm01680f1.pdf [file d1sm01680f1.pdf]

**Supporting Information: Metachronal patterns by magnetically-programmable  
artificial cilia surfaces for low Reynolds number fluid transport and mixing**

Rongjing Zhang,<sup>a)</sup> Jaap den Toonder,<sup>b)</sup> and Patrick R. Onck<sup>c)</sup>

(Dated: 7 April 2022)

---

<sup>a)</sup>Zernike Institute for Advanced Materials, University of Groningen, 9747AG Groningen, The Netherlands

<sup>b)</sup>Department of Mechanical Engineering, Eindhoven University of Technology, P.O. Box 513, 5600 MB Eindhoven,  
The Netherlands; Institute for Complex Molecular Systems, Eindhoven University of Technology, The Netherlands

<sup>c)</sup>Zernike Institute for Advanced Materials, University of Groningen, 9747AG Groningen, The Netherlands; Elec-  
tronic mail: p.r.onck@rug.nl

## I. EXPERIMENTAL SET UP

In this paper we follow closely the experimental set-up of our previous work<sup>1</sup>. We therefore briefly summarize here the most important aspects of the experimental system. Ferromagnetic-elastic sheet-based artificial cilia were made of composite materials of silicone rubber, which has a density of  $(2.00 \pm 0.056) \times 10^3 \text{kg/m}^{-3}$  and an average Young's modulus of 144 kPa. A rotating Halbach array was used to generate a rotating uniform magnetic field, which was about 40 mT. The uniformity of the magnetic field in the workspace was  $\sim 95\%$  in the region that covered the whole artificial cilia array in the experiments. The artificial cilia array was fixed in a container filled with glycerol (99.8% volume ratio), which had a density of  $1.257 \times 10^3 \text{kg/m}^{-3}$  and a dynamic viscosity of 0.876 Pa·s at room temperature of 25°C.

## II. MOVIES

The  $6 \times 6$  cilia array has a pitch of  $L_x = 1.75L$  and  $L_y = 0.75W$  and the frequency is 1 Hz. The movies are played at 0.3 times the real speed, except Movie ESI 9 which is played at 1.5 times the real speed. Movies ESI 1 until ESI 9 contain an angled view, while movies ESI 10 to 14 contain top views emphasizing the metachronal wave propagation angle  $\gamma$ .

Movie ESI 1: Synchronous beating for  $\Delta\phi_x = 0$  and  $\Delta\phi_y = 0$ .

Movie ESI 2: Antiplectic metachronal wave for  $\Delta\phi_x = -\pi/6$  and  $\Delta\phi_y = 0$ .

Movie ESI 3: Symplectic metachronal wave for  $\Delta\phi_x = \pi/6$  and  $\Delta\phi_y = 0$ .

Movie ESI 4: Laeoplectic metachronal wave for  $\Delta\phi_x = 0$  and  $\Delta\phi_y = \pi/6$ .

Movie ESI 5: Laeoplectic metachronal wave for  $\Delta\phi_x = 0$  and  $\Delta\phi_y = \pi/2$ .

Movie ESI 6: Laeoplectic metachronal wave for  $\Delta\phi_x = 0$  and  $\Delta\phi_y = 2\pi/3$ .

Movie ESI 7: Antiplectic-laeoplectic metachronal wave for  $\Delta\phi_x = -\pi/6$  and  $\Delta\phi_y = \pi/6$ .

Movie ESI 8: Symplectic-laeoplectic metachronal wave for  $\Delta\phi_x = \pi/6$  and  $\Delta\phi_y = \pi/6$ .

Movie ESI 9: Antiplectic-laeoplectic metachronal wave for  $\Delta\phi_x = -5\pi/6$  and  $\Delta\phi_y = \pi/3$ .

Movie ESI 10: Top view of antiplectic metachrony for  $\gamma = \pi$  ( $\Delta\phi_x = -\pi/3$  and  $\Delta\phi_y = 0$ ).

Movie ESI 11: Top view of antiplectic-laeoplectic metachrony for  $\gamma = 1.37\pi$  ( $\Delta\phi_x = -\pi/3$  and  $\Delta\phi_y = \pi/3$ ).

Movie ESI 12: Top view of symplectic metachrony for  $\gamma = 0$  ( $\Delta\phi_x = \pi/3$  and  $\Delta\phi_y = 0$ ).

Movie ESI 13: Top view of symplectic-laeoplectic metachrony for  $\gamma = 1.635\pi$  ( $\Delta\phi_x = \pi/3$  and

$$\Delta\phi_y = \pi/3).$$

Movie ESI 14: Top view of laeoplectic metachrony for  $\gamma = 1.5\pi$  ( $\Delta\phi_x = 0$  and  $\Delta\phi_y = \pi/3$ ).

### III. FIGURES

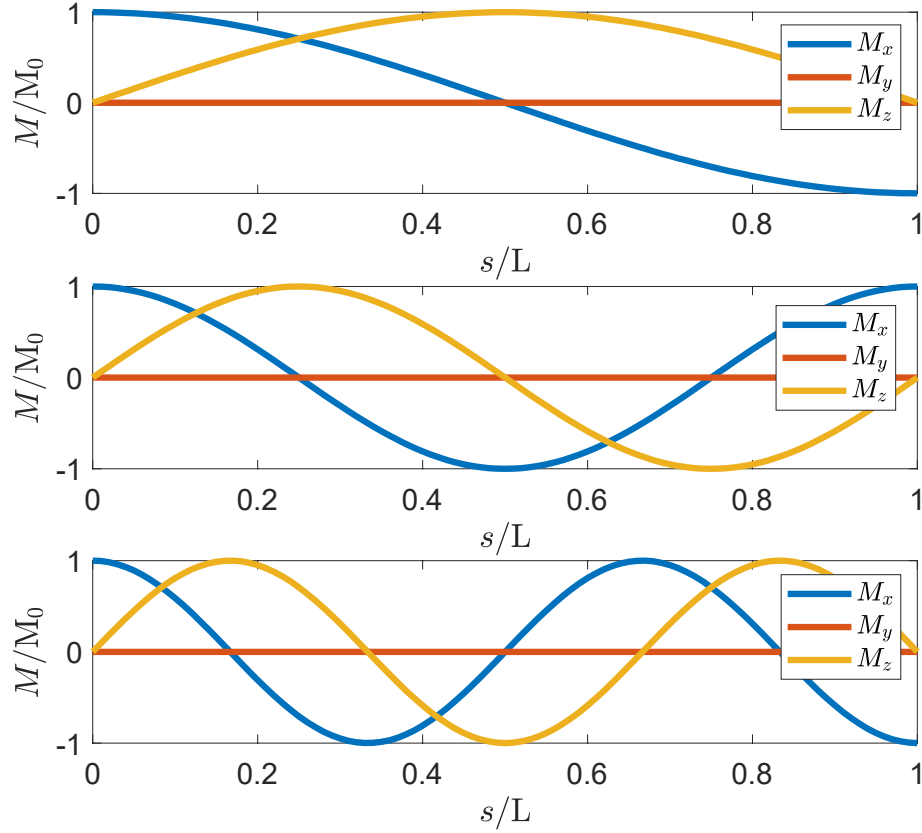

FIG. S1. The magnetization  $M/M_0$  as a function of  $s/L$  for (a)  $\alpha = \pi$ , (b)  $\alpha = 2\pi$  and (c)  $\alpha = 3\pi$ .

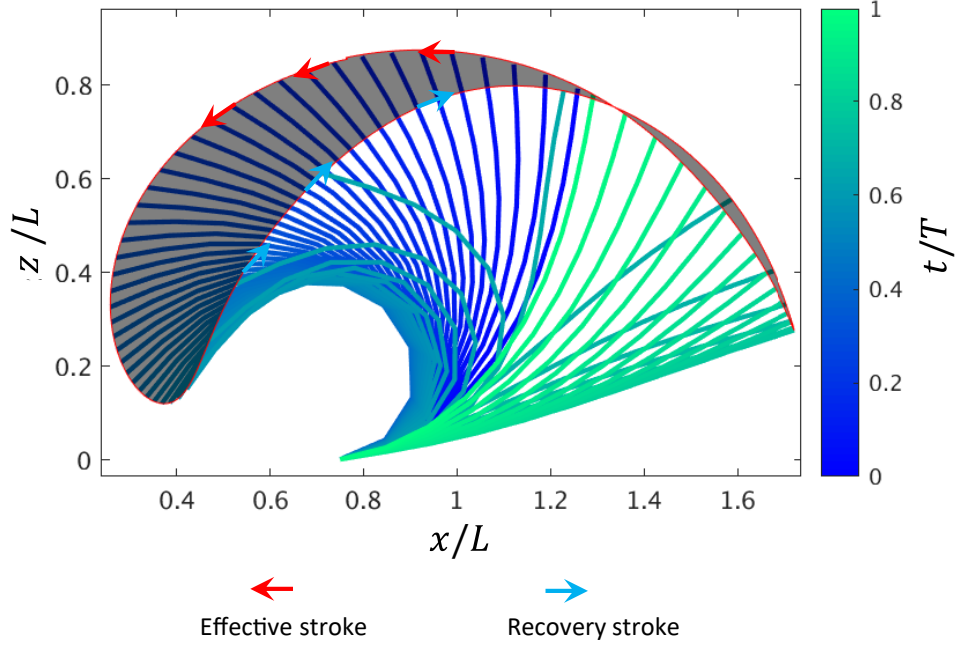

FIG. S2. A non-reciprocal cilium with effective stroke and recovery stroke. The grey area is the negative swept area ( $S_A$ ) of the cilium tip in a full beating cycle  $T$ .

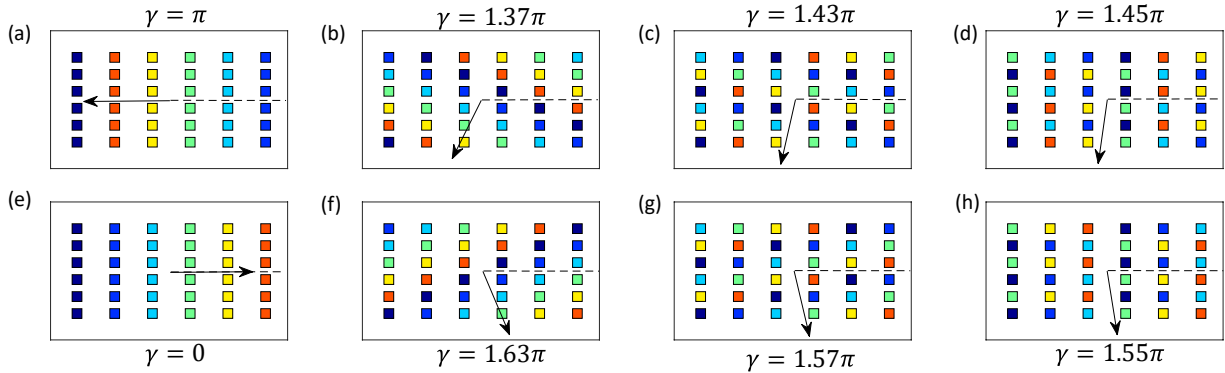

FIG. S3. The cilia beating patterns. (a) AM-LM wave for  $\Delta\phi_x = -\pi/3, \Delta\phi_y = 0$  with  $\gamma = \pi$  (see movie ESI 10), (b) AM-LM wave for  $\Delta\phi_x = -\pi/3, \Delta\phi_y = \pi/3$  with  $\gamma = 1.37\pi$  (see movie ESI 11), (c) AM-LM wave for  $\Delta\phi_x = -\pi/3, \Delta\phi_y = 2\pi/3$  with  $\gamma = 1.43\pi$ , (d) AM-LM wave for  $\Delta\phi_x = -\pi/3, \Delta\phi_y = \pi$  with  $\gamma = 1.45\pi$ , (e) SM-LM wave for  $\Delta\phi_x = \pi/3, \Delta\phi_y = 0$  with  $\gamma = 0$  (see movie ESI 12), (f) SM-LM wave for  $\Delta\phi_x = \pi/3, \Delta\phi_y = \pi/3$  with  $\gamma = 1.63\pi$  (see movie ESI 13), (g) SM-LM wave for  $\Delta\phi_x = \pi/3, \Delta\phi_y = 2\pi/3$  with  $\gamma = 1.57\pi$ , (h) SM-LM wave for  $\Delta\phi_x = \pi/3, \Delta\phi_y = \pi$  with  $\gamma = 1.55\pi$ . The wave transform direction is dark blue, blue, light blue, green, yellow, red.

## REFERENCES

- <sup>1</sup>X. Dong, G. Z. Lum, W. Hu, R. Zhang, Z. Ren, P. R. Onck and M. Sitti, *Science Advances*, 2020, **6**, eabc9323.

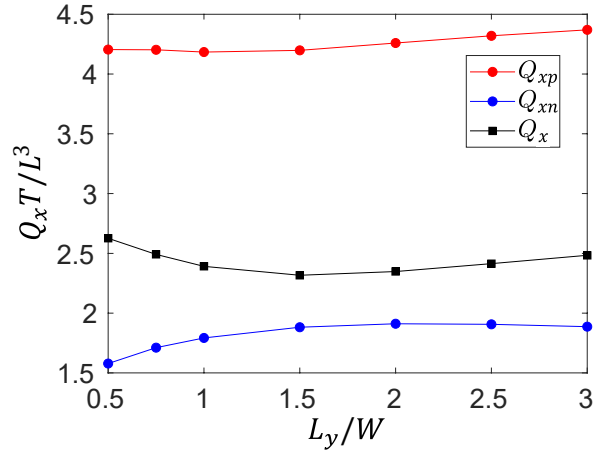

FIG. S4. Shielding effect on  $Q_x$  for  $L_x=4L$  as a function of cilia spacing  $L_y$ .  $Q_{xp}$  is the fluid volume in the effective stroke and  $Q_{xn}$  is the fluid volume in the recovery stroke during one beating cycle.
